# Supplementary material for: Characteristics of YCoO3-type perovskite oxide and application as an SOFC cathode
Source: Royal Society of Chemistry journal article supplement (doi:10.1039/d0ta09487k), 2021-01-01
Supplement: d0ta09487k1.pdf [file d0ta09487k1.pdf]

## Supporting Information

### Characteristics of YCoO<sub>3</sub> type Perovskite Oxide and Application as an SOFC Cathode

Takaaki Sakai<sup>a),b),c)\*</sup>, Masako Ogushi<sup>c)</sup>, Kohei Hosoi<sup>c)</sup>, Atsushi Inoishi<sup>d)</sup>, Hidehisa Hagiwara<sup>c),e)</sup>, Shintaro Ida<sup>c),e)</sup>, Masatsugu Oishi<sup>f)</sup>, Tatsumi Ishihara<sup>c),e)</sup>

<sup>a)</sup> Global Zero Emission Research Center, National Institute of Advanced Industrial Science and Technology (AIST), 1-1-1 Higashi, Tsukuba, Ibaraki 305-8565, Japan

<sup>b)</sup> Center for Molecular Systems (CMS), Kyushu University, 744 Motooka, Nishi-ku, Fukuoka 819-0395, Japan

<sup>c)</sup> Department of Applied Chemistry, Faculty of Engineering, Kyushu University, 744 Motooka, Nishi-ku, Fukuoka 819-0395, Japan

<sup>d)</sup> Department of Advanced Device Materials, Institute for Materials Chemistry and Engineering, Kyushu University, 6-1 Kasugakouen, Kasuga, Fukuoka 816-8580, Japan

<sup>e)</sup> International Institute for Carbon Neutral Energy Research (WPI-I2CNER), Kyushu University, 744 Motooka, Nishi-ku, Fukuoka 819-0395, Japan

<sup>f)</sup> Graduate School of Technology, Industrial and Social Science, Tokushima University, Tokushima 770-8506, Japan

\* Corresponding author: Dr. Takaaki Sakai

1-1-1 Higashi, Tsukuba, Ibaraki 305-8565, Japan

tel: +81-29-861-8212

e-mail: sakai-takaaki@aist.go.jp

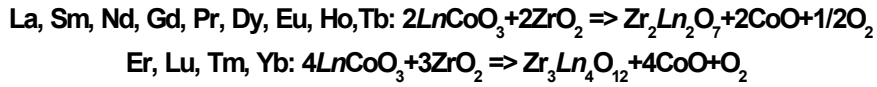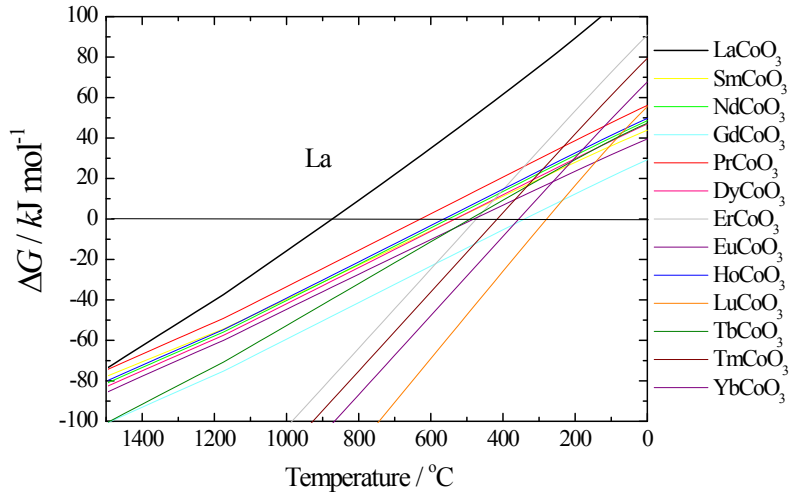

Fig. S1. Gibbs free energy  $\Delta G$ , of the reaction between  $LnCoO_3$  and  $ZrO_2$  as a function of temperature calculated from the thermodynamic database (MALT-2). In this figure,  $LnCoO_3$  and  $ZrO_2$  react and form the pyrochlore phase (or  $Ln_4Zr_3O_{12}$  phase <sup>16</sup>) when  $\Delta G$  became negative. Only the La based cobaltite ( $LaCoO_3$ ) can maintain a positive  $\Delta G$  up to around 900 °C, which indicates that the current La based cathode is the most stable toward the  $ZrO_2$  electrolyte.

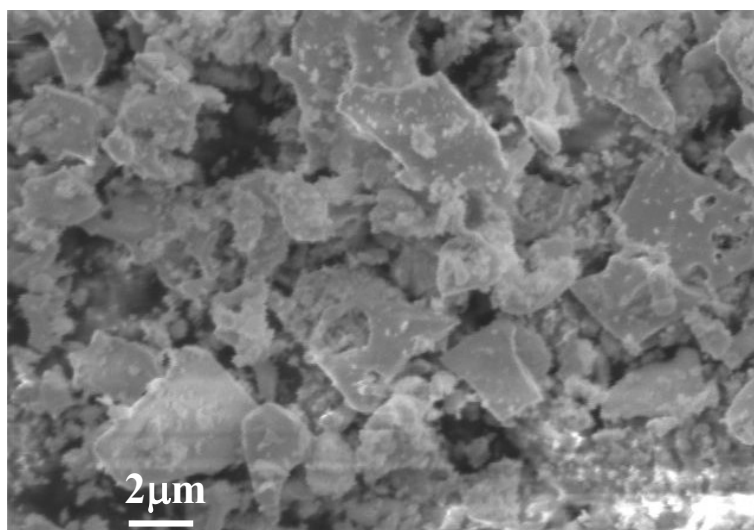

Fig. S2. SEM image of YCO-096 cathode powder after ball-milling with 15 mm milling media at 300 rpm for 1 h.

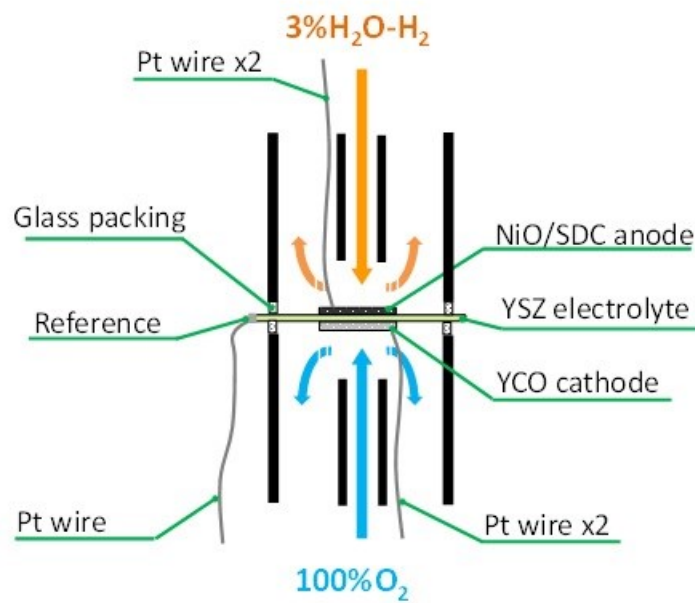

Fig. S3. Schematic illustration of the experimental apparatus for the SOFC power generation test using the YCO cathode cell.

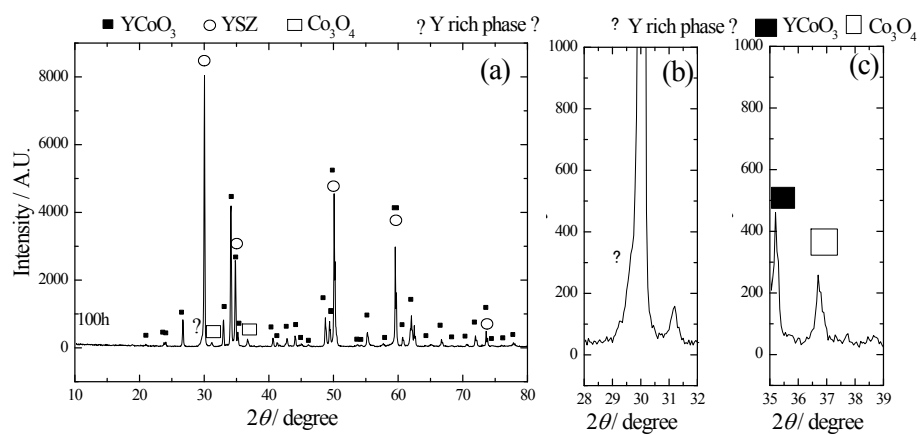

Fig. S4. XRD pattern of a mixture of  $Y_{0.96}CoO_{3-\delta}$  and YSZ-8 heated at 975 °C for 100 h. The weight ratio of the YCO-YSZ mixture was 1:1. (a) XRD pattern from 10° to 80°, (b) magnified pattern from 28° to 32°, and (c) magnified pattern from 35° to 39°.

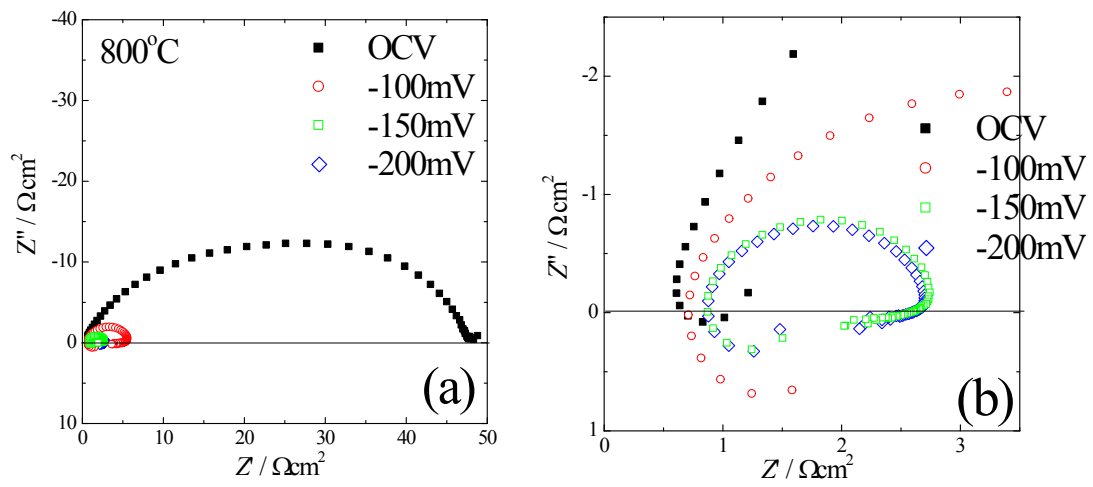

Fig. S5 Impedance spectra of the YCO cathode measured under OCV or cathodic biased condition. Overall view (a), and magnified spectra around ohmic resistance (b).
